# Supplementary material for: Hand Grip Strength Relative to Waist Circumference as a Means to Identify Men and Women Possessing Intact Mobility in a Cohort of Older Adults with Type 2 Diabetes
Source: MDPI journal article supplement (doi:10.3390/biomedicines11020352), 2023-01-26
Supplement: s1 [file s1]

# Supplementary File for "Hand Grip Strength Relative to Waist Circumference as a Means to Identify Men and Women Possessing Intact Mobility in a Cohort of Older Adults with Type 2 Diabetes"

**Table S1.** Univariate independent t-tests performed between each HGS index and patients passing cut-off points of all mobility tests (mobility intact). (a) Independent Samples Test men. (b) Independent Samples Test women.

| (a)       |                              |    |                 |                 |                       |                                           |          |
|-----------|------------------------------|----|-----------------|-----------------|-----------------------|-------------------------------------------|----------|
| HGS index | t-test for Equality of Means |    |                 |                 |                       |                                           |          |
|           | t                            | df | Sig. (2-tailed) | Mean Difference | Std. Error Difference | 95% Confidence Interval of the Difference |          |
|           |                              |    |                 |                 |                       | Lower                                     | Upper    |
| HGS       | -2.813                       | 48 | 0.007           | -5.0217         | 1.7854                | -8.6115                                   | -1.4318  |
| HGS/BMI   | -3.032                       | 48 | 0.004           | -0.25200        | 0.08313               | -0.41914                                  | -0.08486 |
| HGS/FM    | -2.762                       | 48 | 0.008           | -0.41550        | 0.15045               | -0.71801                                  | -0.11299 |
| HGS/SMM   | -1.196                       | 48 | 0.238           | -0.09750        | 0.08152               | -0.26141                                  | 0.06641  |
| HGS/PBF   | -2.886                       | 48 | 0.006           | -0.29533        | 0.10234               | -0.50110                                  | -0.08957 |
| HGS/WC    | -3.548                       | 48 | 0.001           | -0.07333        | 0.02067               | -0.11489                                  | -0.03177 |
| HGS/BW    | -3.282                       | 48 | 0.002           | -0.08400        | 0.02560               | -0.13546                                  | -0.03254 |
| HGS/H     | -2.963                       | 48 | 0.005           | -2.92117        | 0.98573               | -4.90311                                  | -0.93922 |
| (b)       |                              |    |                 |                 |                       |                                           |          |
| HGS index | t-test for Equality of Means |    |                 |                 |                       |                                           |          |
|           | t                            | df | Sig. (2-tailed) | Mean Difference | Std. Error Difference | 95% Confidence Interval of the Difference |          |
|           |                              |    |                 |                 |                       | Lower                                     | Upper    |
| HGS       | -1.789                       | 70 | 0.078           | -2.0172         | 1.1277                | -4.2663                                   | 0.2318   |
| HGS/BMI   | -3.092                       | 70 | 0.003           | -0.14803        | 0.04787               | -0.24351                                  | -0.05255 |
| HGS/FM    | -2.617                       | 70 | 0.011           | -0.16363        | 0.06252               | -0.28831                                  | -0.03895 |
| HGS/SMM   | -1.942                       | 70 | 0.056           | -0.13161        | 0.06777               | -0.26678                                  | 0.00357  |
| HGS/PBF   | -2.476                       | 70 | 0.016           | -0.08074        | 0.03261               | -0.14577                                  | -0.01570 |
| HGS/WC    | -3.255                       | 70 | 0.002           | -0.03808        | 0.01170               | -0.06141                                  | -0.01475 |
| HGS/BW    | -3.094                       | 70 | 0.003           | -0.05477        | 0.01770               | -0.09007                                  | -0.01946 |
| HGS/H     | -1.647                       | 70 | 0.104           | -1.11711        | 0.67817               | -2.46967                                  | 0.23545  |

Abbreviations: BMI, Body Mass Index; FM, fat mass; H, height; HGS, hand-grip strength; PBF, percent body fat; SMM, skeletal muscle mass; WC, waist circumference.

**Table S2.** Pearson Chi-Square tests of possible confounders and passing all three mobility tests.

| Confounder                          | Value | Df | Asymp. Sig. (2-sided) |
|-------------------------------------|-------|----|-----------------------|
| <b>Men</b>                          |       |    |                       |
| Hypertension                        | 2.037 | 1  | 0.153                 |
| Diabetes complications <sup>1</sup> | 0.055 | 1  | 0.815                 |
| Physical activity <sup>2</sup>      | 5.333 | 1  | 0.021 *               |
| Body Mass Index (≥30)               | 2.391 | 1  | 0.122                 |
| Vitamin D (<25 ng/ml)               | 0.033 | 1  | 0.856                 |
| Polypharmacy (≥8 drugs)             | 0.306 | 1  | 0.580                 |
| <b>Women</b>                        |       |    |                       |
| Hypertension                        | 0.832 | 1  | 0.362                 |
| Diabetes complications <sup>1</sup> | 0.795 | 1  | 0.373                 |
| Physical activity <sup>2</sup>      | 6.926 | 1  | 0.008 *               |
| Body Mass Index (≥30)               | 4.281 | 1  | 0.039 *               |
| Vitamin D (<25 ng/ml)               | 2.053 | 1  | 0.152                 |
| Polypharmacy (≥8 drugs)             | 1.475 | 1  | 0.225                 |

\* p <0.05; <sup>1</sup> diagnosis of neuropathy, retinopathy, chronic kidney disease, ischemic heart disease; <sup>2</sup> Performing ≤ 2 days a week of any leisure aerobic physical activity.
